# Supplementary material
Source: PubMed Central journal article supplement (PMC2862262)
Supplement: NIHMS189907-supplement-1_si_001.pdf [file NIHMS189907-supplement-1_si_001.pdf]

## Supporting Information

### Convergence of REMD sampling

The convergence of REMD sampling for the mutant (MT) hexamer was checked using the number  $N_s$  of unique states ( $E_{eff}, C$ ) sampled at least once in the course of simulations. Each state ( $E_{eff}, C$ ) is defined by the effective energy of the hexamer,  $E_{eff}$ , which includes the potential and solvation energies, and by the number of side chain contacts between incoming peptide and the fibril,  $C$ . Fig. S1 shows  $N_s$  as a function of the cumulative equilibrium simulation time  $\tau_{sim}$ . At  $\tau_{sim} > 5 \mu s$   $N_s$  starts to level off suggesting the onset of approximate convergence of REMD simulations. Further test of the quality of REMD sampling is provided by the comparison of  $N_s(\tau_{sim})$  computed for each of the two incoming peptides. Because  $N_s$  for both peptides in Fig. S1 are in very close agreement, the REMD sampling is approximately converging. Similar results were obtained, if the convergence of REMD is tested using the states ( $E_{eff}, C_h$ ), where  $C_h$  is the number of peptide-fibril hydrophobic side chain contacts.

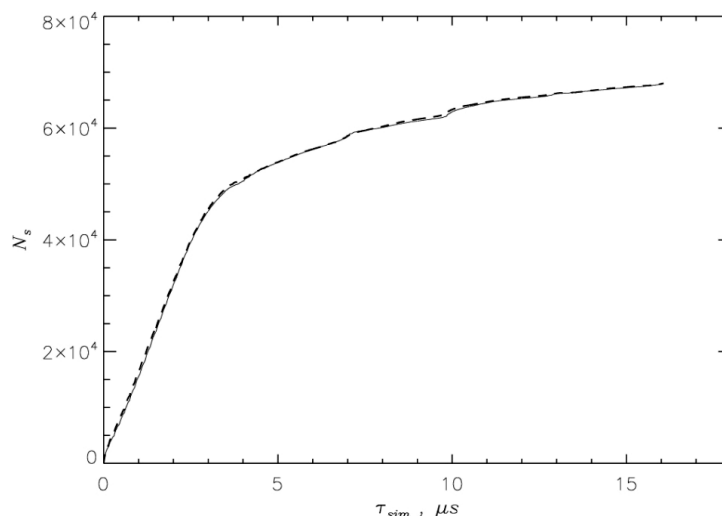

Fig. S1 The number  $N_s$  of the new states ( $E_{eff}, C$ ) not previously sampled in REMD as a function of the cumulative equilibrium simulation time  $\tau_{sim}$ . Continuous and dashed lines represent  $N_s$  for each of the two incoming peptides. The data are for the MT A $\beta_{10-40}$  hexamer.

Additional check of REMD convergence was performed by dividing the simulation data into two equal subsets and analyzing them separately. The thermodynamic quantities probing binding of incoming peptides to the fibril obtained from the two subsets differed by no more than 7%. The errors for the dimer system do not exceed 9%.

### Deletion of interpeptide hydrogen bonds in A $\beta$ dimer

We probed the impact of switching off interpeptide backbone hydrogen bonds (HBs) in A $\beta$  dimer by considering its free energy landscape. Fig. S2 shows the peptide free energy as a function of the fraction of  $\beta$ -structure.

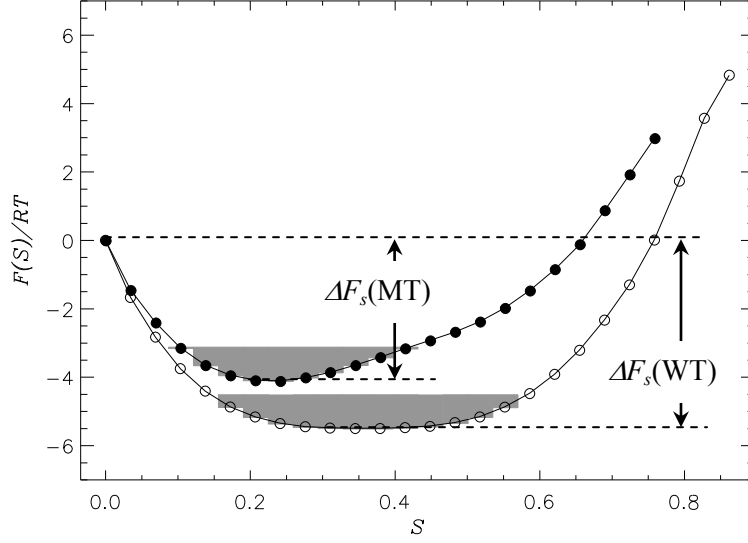

Fig. S2 Free energy of A $\beta_{10-40}$  peptide in the dimer,  $F(S)$ , as a function of the fraction of residues in  $\beta$ -strand conformation  $S$ : the MT (filled circles), the WT (open circles). The free energy of the state with large fraction of  $\beta$ -structure is  $\Delta F_S = F_S - F(S=0)$ .  $F_S$  is obtained by integrating over the shaded states, for which  $F(S) \leq F_{min} + 1.0RT$ , where  $F_{min}$  is the minimum in  $F(S)$ . The free energies  $F(S)$  are computed at 360K. Deletion of HBs destabilizes  $\beta$ -structure in the dimer.

The contribution of interpeptide HBs is further analyzed by considering the distribution of interpeptide side chain contacts formed by individual residues in A $\beta_{10-40}$  dimer (Fig. S3).

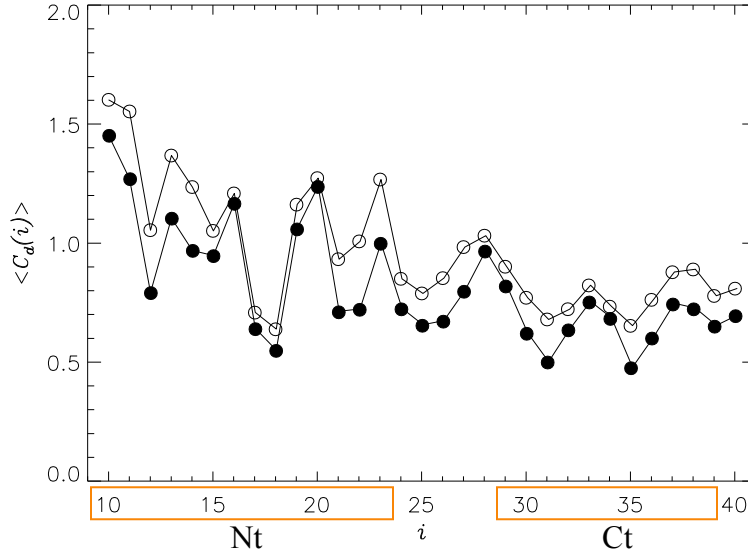

Fig. S3 Number of interpeptide side chain contacts  $\langle C_d(i) \rangle$  formed by individual residues  $i$  in A $\beta_{10-40}$  dimer: the MT (filled circles), the WT (open circles). The plot suggests that the deletion of HBs has minor impact on the interpeptide interactions in the dimer. The Nt and Ct sequence regions are boxed. The distribution  $\langle C_d(i) \rangle$  is computed at 360K.

## Probabilities of binding to distinct fibril edges

To investigate the impact of deletion of peptide-fibril HBs on A $\beta$  fibril growth, we computed the probabilities of MT peptide binding to the concave (CV) and convex (CX) fibril edges (Fig. S4 and also Fig. 1b in the paper).

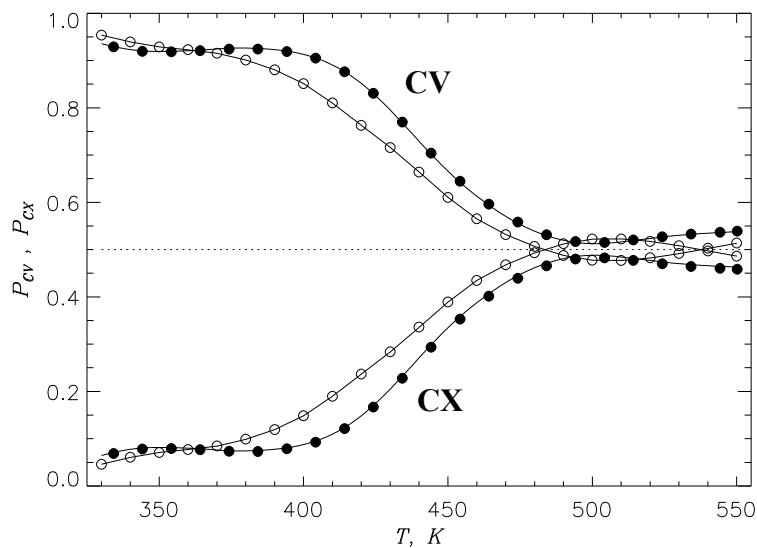

Fig. S4 The probabilities of binding to the CV and CX edges as a function of temperature,  $P_{CV}(T)$  and  $P_{CX}(T)$ : the MT (filled circles), the WT (open circles). Because the MT and WT peptides demonstrate similar preferences to bind to the CV edge, we conclude that the deletion of peptide-fibril HBs does not alter the affinities of the fibril edges with respect to incoming peptides.
